# Supplementary material
Source: PubMed Central journal article supplement (PMC8810710)
Supplement: NIHMS1767310-supplement-supinfo1.pdf [file NIHMS1767310-supplement-supinfo1.pdf]

# Insulin potentiates the response to capsaicin in dorsal root ganglion neurons in vitro and muscle afferents ex vivo in normal healthy rodents

Amane Hori, Norio Hotta, Ayumi Fukazawa, Juan A Estrada, Kimiaki Katanosaka, Kazue Mizumura, Jun Sato, Rie Ishizawa, Han Kyul Kim, Gary A Iwamoto, Wanpen Vongpatanasin, Jere H Mitchell, Scott A. Smith, and Masaki Mizuno  
**DOI: 10.1113/JP282740**

*Corresponding author(s): Masaki Mizuno (masaki.mizuno@utsouthwestern.edu)*

*The referees have opted to remain anonymous.*

---

## Review Timeline:

|                        |             |
|------------------------|-------------|
| Submission Date:       | 04-May-2021 |
| Editorial Decision:    | 01-Jun-2021 |
| Resubmission Received: | 15-Dec-2021 |
| Editorial Decision:    | 17-Dec-2021 |
| Revision Received:     | 22-Dec-2021 |
| Accepted:              | 23-Dec-2021 |

---

*Senior Editor: Harold Schultz*

*Reviewing Editor: Beth Habecker*

## Transaction Report:

(Note: With the exception of the correction of typographical or spelling errors that could be a source of ambiguity, letters and reports are not edited. Depending on transfer agreements, referee reports obtained elsewhere may or may not be included in this compilation. Referee reports are anonymous unless the Referee chooses to sign their reports.)

Dear Dr Mizuno,

Re: JP-RP-2021-281874 "Insulin potentiates the response to capsaicin in dorsal root ganglion neurons in vitro and muscle afferents ex vivo in normal healthy rodents" by Amane Hori, Norio Hotta, Kimiaki Katanosaka, Kazue Mizumura, Jun Sato, Rie Ishizawa, Han Kyul Kim, Gary A Iwamoto, Wanpen Vongpatanasin, Jere H Mitchell, Scott A. Smith, and Masaki Mizuno

Thank you for submitting your manuscript to The Journal of Physiology. It has been assessed by a Reviewing Editor and by 2 Referees and the reports are copied below.

Please let your co-authors know of the following editorial decision as quickly as possible.

As you will see, in its current form, the manuscript is not acceptable for publication in The Journal of Physiology. In comments to me, the Reviewing Editor expressed interest in the potential of this study, but much work still needs to be done (and this may include new experiments) in order to satisfactorily address the concerns raised in the reports.

In view of this interest, I would like to offer you the opportunity to carry out all of the changes requested in full, and to resubmit a new manuscript using the "Submit Special Case Resubmission for JP-RP-2021-281874..." on your homepage.

We cannot, of course, guarantee ultimate acceptance at this stage as the revisions required are substantial. However, we encourage you to consider the requested changes and resubmit your work to us if you are able to complete or address all changes.

A new manuscript would be renumbered and redated, but the original referees would be consulted wherever possible. An additional referee's opinion could be sought, if the Reviewing Editor felt it necessary. A full response to each of the reports should be uploaded with a new version.

I hope that the points raised in the reports will be helpful to you.

Yours sincerely,

Harold D Schultz  
Senior Editor  
The Journal of Physiology  
<https://jp.msubmit.net>  
<http://jp.physoc.org>  
The Physiological Society  
Hodgkin Huxley House  
30 Farringdon Lane  
London, EC1R 3AW  
UK  
<http://www.physoc.org>  
<http://journals.physoc.org>

-----  
EDITOR COMMENTS

Reviewing Editor:

The study is solid and the observation is interesting, if somewhat similar to the recent JP publication showing insulin-induced mechanical sensitization of small DRG neurons that might lead to sympathoexcitation. The difference in this study is the focus on insulin-induced chemical sensitization. This is a logical follow-up to the earlier study, but has somewhat less impact since the observation that insulin can sensitize peripheral DRG neurons is no longer novel.

Please address all points raised by reviewers including whether TRPV1 and insulin receptors are co-localized in the cells you examined, why the various statistical tests were selected, and how your dosing compares with physiological insulin levels in these tissues. Please be more careful in the language around sympathoexcitation since sympathetic parameters aren't being measured.

Senior Editor:

Comments for Authors to ensure the paper complies with the Statistics Policy:

Actual p values must be stated

Comments to the Author:

The study was deemed to be minorly incremental to the investigators' previous work and marginally novel. Addition of functional studies to assess insulin sensitization of sympatho-excitatory responses to CAPS stimulation of muscle afferents, or relation of present study to TRPV1 muscle afferent responses in a diabetic model would enhance impact of the study.

-----  
REFeree COMMENTS

Referee #1:

I read with great interest the present manuscript. Hori et al. clearly demonstrated that insulin potentiates TRPV1 responsiveness to capsaicin at the DRG and muscle tissue levels, possibly contributing to insulin-induced sympathoexcitation. Please see my comments below.

Could the authors provide any discussion/information if TRPV1 and insulin receptors are colocalized on nociceptors and/or metabolically sensitive skeletal muscle receptors? The lack of this information may be a major limitation. Please quote.

Another concern is related to the statistical approach used. For example, is there any rationale/calculation for using 40 small DRG neurons? Please, provide.

The authors have used both parametric and non-parametric approaches without providing any criteria for that. Please fix it.

Minor:

Throughout the manuscript (ABSTRACT and lines 350-351, 389) the authors state: "insulin-induced sympathoexcitation". Please be specific about the condition? Is it resting baseline? Is it exercise? IT is tempting to state this, and I understand that. However, there is no sympathetic measures in the present study. Please tone this down.

Referee #2:

The authors investigated whether insulin sensitizes skeletal muscle afferents and capsaicin sensitive TRPV1 receptors in dorsal root ganglion cells which could thereby support that insulin could elicit exaggerated sympathoactivation during exercise. The manuscript is well written and the results are straight forward.

I offer only the following relatively minor comments for the authors to consider.

There is little if any discussion of the physiological relevance of the levels of insulin utilized either in the bathing media or injected into the muscle. This would improve the relevance of the manuscript. No dose response effects are described. This could also improve the results.

Sjöstrand, Mikaela, Agneta Holmäng, and Peter Lönnroth. Measurement of interstitial insulin in human muscle. *Am. J. Physiol.* 276 (Endocrinol. Metab. 39): E151-E154, 1999

Specific Comments:

Line 43 "sympathoexcitatory actions but the mechanisms underlying this observation is unknown" should be changed to These observations are unknown.

-----  
ADDITIONAL FORMATTING REQUIREMENTS:

-Author photo and profile. First (or joint first) authors are asked to provide a short biography (no more than 100 words for one author or 150 words in total for joint first authors) and a portrait photograph. These should be uploaded and clearly labelled with the revised version of the manuscript. See [Information for Authors](#) for further details.

-Your manuscript must include a complete [Additional Information section](#)

-Please upload separate high-quality [figure files](#) via the submission form.

-A Statistical Summary Document, summarising the statistics presented in the manuscript, is required upon revision. It must be on the Journal's template, which can be downloaded from the link in the Statistical Summary Document section here: [https://jp.msubmit.net/cgi-bin/main.plex?form\\_type=display\\_requirements#statistics](https://jp.msubmit.net/cgi-bin/main.plex?form_type=display_requirements#statistics)

-Papers must comply with the Statistics Policy [https://jp.msubmit.net/cgi-bin/main.plex?form\\_type=display\\_requirements#statistics](https://jp.msubmit.net/cgi-bin/main.plex?form_type=display_requirements#statistics)

In summary:

-If  $n$  {less than or equal to} 30, all data points must be plotted in the figure in a way that reveals their range and distribution. A bar graph with data points overlaid, a box and whisker plot or a violin plot (preferably with data points included) are acceptable formats.

-If  $n > 30$ , then the entire raw dataset must be made available either as supporting information, or hosted on a not-for-profit repository e.g. FigShare, with access details provided in the manuscript.

- $n$  clearly defined (e.g.  $x$  cells from  $y$  slices in  $z$  animals) in the Methods. Authors should be mindful of pseudoreplication.

-All relevant  $n$  values must be clearly stated in the main text, figures and tables, and the Statistical Summary Document (required upon revision)

-The most appropriate summary statistic (e.g. mean or median and standard deviation) must be used. Standard Error of the Mean (SEM) alone is not permitted.

-Exact  $p$  values must be stated. Authors must not use 'greater than' or 'less than'. Exact  $p$  values must be stated to three significant figures even when 'no statistical significance' is claimed.

-Statistics Summary Document completed appropriately upon revision

-A Data Availability Statement is required for all papers reporting original data. This must be in the Additional Information section of the manuscript itself. It must have the paragraph heading "Data Availability Statement". All data supporting the results in the paper must be either: in the paper itself; uploaded as Supporting Information for Online Publication; or archived in an appropriate public repository. The statement needs to describe the availability or the absence of shared data. Authors must include in their Statement: a link to the repository they have used, or a statement that it is available as Supporting Information; reference the data in the appropriate sections(s) of their manuscript; and cite the data they have shared in the References section. Whenever possible the scripts and other artefacts used to generate the analyses presented in the paper should also be publicly archived. If sharing data compromises ethical standards or legal requirements then authors are not expected to share it, but must note this in their Statement. For more information, see our [Statistics Policy](#).

\*\*\*\*\*



## **Manuscript#: JP-RP-2021-281874 R1**

Insulin potentiates the response to capsaicin in dorsal root ganglion neurons *in vitro* and muscle afferents *ex vivo* in normal healthy rodents

### **Reviewing Editor**

The study is solid and the observation is interesting, if somewhat similar to the recent JP publication showing insulin-induced mechanical sensitization of small DRG neurons that might lead to sympathoexcitation. The difference in this study is the focus on insulin-induced chemical sensitization. This is a logical follow-up to the earlier study, but has somewhat less impact since the observation that insulin can sensitize peripheral DRG neurons is no longer novel.

**Author response: First, we would like to thank the reviewing editor, senior editor, and reviewers for their thoughtful comments and suggestions. We believe that the revised manuscript is much improved following the incorporation of the suggested revisions. We have addressed all comments fully in the responses to reviewers. All changes made to the manuscript are indicated in red font in the red-lined version of the manuscript. In addition, all references to specific pages, paragraphs and lines in the responses to reviewers refer to the red-lined version submitted.**

1) Please address all points raised by reviewers including whether (i) TRPV1 and insulin receptors are co-localized in the cells you examined, (ii) why the various statistical tests were selected, and (iii) how your dosing compares with physiological insulin levels in these tissues. (iv) Please be more careful in the language around sympathoexcitation since sympathetic parameters aren't being measured.

### **Author response:**

**(i) As pointed out by reviewer#1, we have performed an additional experiment where we examined whether the insulin receptor co-localizes with TRPV1 in small DRG neurons labelled with or without isolectin B4 using immunohistochemistry (details are in Lines 241-263). Consistent with previous studies (PMID: 17492627; 29955950), we have demonstrated co-localization between TRPV1 and insulin receptors in 28.7% of small DRG neurons. (Details are in Lines 408-413).**

**(ii) We confirmed data normality by using the Shapiro-Wilk test and then used parametric or non-parametric analysis according to the normality of the data. Therefore, we have modified some statistical tests and revised the “Statistical analysis” section of the revised manuscript in**

**Lines 326-337.**

**(iii) We have added commentary about the physiological relevance of the levels of insulin chosen for the study using the reference (PMID: 9886961) in the discussion section of the revised manuscript (Lines 500-505).**

**(iv) To address this issue, we have performed additional *in vivo* experiments using decerebrated rats. We measured renal sympathetic nerve activity (RSNA) and mean arterial pressure (MAP) responses to injection of capsaicin into the arterial supply of the hindlimb in decerebrate rats before and after intramuscularly injecting saline solution (vehicle) or insulin (5U/mL) (details are in Lines 265-323). We have observed that the RSNA response to capsaicin after injecting insulin was significantly greater than after injection of saline. Further, the MAP response to capsaicin administration was significantly augmented by intramuscular injection of insulin (Details are in Lines 415-444).**

## **Senior Editor**

1) Comments for Authors to ensure the paper complies with the Statistics Policy: Actual p values must be stated

**Author response: Following the statistics policy of the *Journal of Physiology*, we have reported all p values in the manuscript (lines 347-348, 358-359, 382, 388, and 397), as well as in Figures 2 and 5. In addition, in some sections, variability was incorrectly characterized by reporting standard error. This has been corrected such that only standard deviations are now reported (lines 358-359, and 382).**

Comments to the Author

2) The study was deemed to be minorly incremental to the investigators' previous work and marginally novel. Addition of functional studies to assess insulin sensitization of sympatho-exitatory responses to CAPS stimulation of muscle afferents, or relation of present study to TRPV1 muscle afferent responses in a diabetic model would enhance impact of the study.

**Author response: As suggested, we have performed additional *in vivo* experiments using decerebrated rats. We measured renal sympathetic nerve activity (RSNA) and mean arterial pressure (MAP) responses to injection of capsaicin into the arterial supply of the hindlimb in decerebrate rats before and after intramuscularly injecting saline solution (vehicle) or insulin (5U/mL) (details are in Lines 265-323). We observed that the RSNA response to capsaicin after injecting insulin was significantly greater than after injection of saline. Further, the MAP response to capsaicin administration was significantly augmented by intramuscular injection of insulin (Details are in Lines 415-444).**



## **Referee #1**

I read with great interest the present manuscript. Hori et al. clearly demonstrated that insulin potentiates TRPV1 responsiveness to capsaicin at the DRG and muscle tissue levels, possibly contributing to insulin-induced sympathoexcitation. Please see my comments below.

1) Could the authors provide any discussion/information if TRPV1 and insulin receptors are colocalized on nociceptors and/or metabolically sensitive skeletal muscle receptors? The lack of this information may be a major limitation. Please quote.

**Author response: As suggested, we have performed additional immunohistochemical experiments examining whether the insulin receptor co-localizes with TRPV1 in small DRG neurons labelled with or without isolectin B4 (details are in Lines 241-263). Consistent with previous studies (PMID: 17492627; 29955950), we have demonstrated co-localization between TRPV1 and the insulin receptor in 28.7% of small DRG neurons. (Details are in Lines 408-413).**

2) Another concern is related to the statistical approach used. For example, is there any rationale/calculation for using 40 small DRG neurons? Please, provide.

**Author response: In the present study, we adhered to the principles of the 3Rs (replacement, reduction and refinement) in the *Journal of Physiology* and *Experimental Physiology* (PMID: 26095019). Based on these principles, to minimize the use of animals, we terminated experiments when statistically significant differences were obtained.**

3) The authors have used both parametric and non-parametric approaches without providing any criteria for that. Please fix it.

**Author response: We firstly confirmed data normality by using the Shapiro-Wilk test and then performed parametric or non-parametric analysis as appropriate based on the presence or absence of a normal data distribution. Therefore, we have modified some statistical tests and revised the "Statistical analysis" section of the manuscript to enhance clarity in Lines 326-337. Thank you very much again for pointing out this important point.**

4) Minor:

Throughout the manuscript (ABSTRACT and lines 350-351, 389) the authors state: "insulin-induced sympathoexcitation". Please be specific about the condition? Is it resting baseline? Is it exercise? It is tempting to state this, and I understand that. However, there is no sympathetic measures in the present study. Please tone this down.

**Author response: We thank the reviewer for this insightful comment. Sympathoexcitation is expected during physical exercise. Thus, we have revised the last sentence of the abstract (Line 67) as well as the last sentence of the conclusion (Lines 554-544). As suggested by the other reviewers, to determine whether insulin augments sympathoexcitation, we have performed additional *in vivo* experiments using decerebrated rats. We measured renal sympathetic nerve activity (RSNA) and mean arterial pressure (MAP) responses to injection of capsaicin into the arterial supply of the hindlimb in decerebrate rats before and after intramuscularly injecting saline solution (vehicle) or insulin (5U/mL) (details are in Lines 265-323). We observed that the RSNA response to capsaicin after injecting insulin was significantly greater than after injection of saline. Further, the MAP response to capsaicin administration was significantly augmented by intramuscular injection of insulin (Details are in Lines 415-444).**

## **Referee #2**

The authors investigated whether insulin sensitizes skeletal muscle afferents and capsaicin sensitive TRPV1 receptors in dorsal root ganglion cells which could thereby support that insulin could elicit exaggerated sympathoactivation during exercise. The manuscript is well written and the results are straight forward. I offer only the following relatively minor comments for the authors to consider.

1) There is little if any discussion of the physiological relevance of the levels of insulin utilized either in the bathing media or injected into the muscle. This would improve the relevance of the manuscript. No dose response effects are described. This could also improve the results.

Sjostrand, Mikaela, Agneta Holmang, and Peter Lonnroth. Measurement of interstitial insulin in human muscle. *Am. J. Physiol.* 276 (Endocrinol. Metab. 39): E151-E154, 1999

**Author response: Thank you for bringing this to our attention. We have added commentary about the physiological relevance of the levels of insulin utilized in the investigation using the reference (PMID: 9886961) in the revised discussion section of the manuscript (Lines 500-505). We acknowledge that concentration dependency should be studied. We did not examine insulin concentration dependency in the present study as our intent was to first clearly establish that insulin maintains the potential to augment the response to chemical stimuli in small DRG neurons and thin fiber muscle afferents, possibly resulting in sympathoexcitation. That being said, lack of concentration dependency is an acknowledged study limitation that we have described in the discussion section of the revised manuscript (Lines 500-505).**

2) Specific Comments:

Line 43 "sympathoexcitatory actions but the mechanisms underlying this observation is unknown" should be changed to These observations are unknown.

**Author response: We agree with your comment and have revised the manuscript accordingly (Line 47).**

Dear Dr Mizuno,

Re: JP-RP-2021-282740X "Insulin potentiates the response to capsaicin in dorsal root ganglion neurons in vitro and muscle afferents ex vivo in normal healthy rodents" by Amane Hori, Norio Hotta, Ayumi Fukazawa, Juan A Estrada, Kimiaki Katanosaka, Kazue Mizumura, Jun Sato, Rie Ishizawa, Han Kyul Kim, Gary A Iwamoto, Wanpen Vongpatanasin, Jere H Mitchell, Scott A. Smith, and Masaki Mizuno

Thank you for resubmitting your revised Research Article to The Journal of Physiology. It has been assessed by the original Reviewing Editor and Referees and has been well received. Some final revisions have been requested.

Please advise your co-authors of this decision as soon as possible.

The reports are copied at the end of this email. Please address all of the points and incorporate all requested revisions, or explain in your Response to Referees why a change has not been made.

**NEW POLICY:** In order to improve the transparency of its peer review process The Journal of Physiology publishes online as supporting information the peer review history of all articles accepted for publication. Readers will have access to decision letters, including all Editors' comments and referee reports, for each version of the manuscript and any author responses to peer review comments. Referees can decide whether or not they wish to be named on the peer review history document.

Authors are asked to use The Journal's premium BioRender (<https://biorender.com/>) account to create/redrawn their Abstract Figures. Information on how to access The Journal's premium BioRender account is here: <https://physoc.onlinelibrary.wiley.com/journal/14697793/biorender-access> and authors are expected to use this service. This will enable Authors to download high-resolution versions of their figures.

I hope you will find the comments helpful and have no difficulty returning your revisions within 4 weeks.

Your revised manuscript should be submitted online using the links in Author Tasks Link Not Available.

Any image files uploaded with the previous version are retained on the system. Please ensure you replace or remove all files that have been revised.

#### REVISION CHECKLIST:

- Article file, including any tables and figure legends, must be in an editable format (eg Word)
- Abstract figure file (see above)
- Statistical Summary Document
- Upload each figure as a separate high quality file
- Upload a full Response to Referees, including a response to any Senior and Reviewing Editor Comments;
- Upload a copy of the manuscript with the changes highlighted.

You may also upload:

- A potential 'Cover Art' file for consideration as the Issue's cover image;
- Appropriate Supporting Information (Video, audio or data set [https://jp.msubmit.net/cgi-bin/main.plex?form\\_type=display\\_requirements#supp](https://jp.msubmit.net/cgi-bin/main.plex?form_type=display_requirements#supp)).

To create your 'Response to Referees' copy all the reports, including any comments from the Senior and Reviewing Editors, into a Word, or similar, file and respond to each point in colour or CAPITALS and upload this when you submit your revision.

I look forward to receiving your revised submission.

If you have any queries please reply to this email and staff will be happy to assist.

Yours sincerely,

Harold D Schultz  
Senior Editor  
The Journal of Physiology  
<https://jp.msubmit.net>  
<http://jp.physoc.org>  
The Physiological Society  
Hodgkin Huxley House  
30 Farringdon Lane  
London, EC1R 3AW  
UK  
<http://www.physoc.org>  
<http://journals.physoc.org>

-----  
REQUIRED ITEMS:

-The Journal of Physiology funds authors of provisionally accepted papers to use the premium BioRender site to create high resolution schematic figures. Follow this [link](#) and enter your details and the manuscript number to create and download figures. Upload these as the figure files for your revised submission. If you choose not to take up this offer we require figures to be of similar quality and resolution. If you are opting out of this service to authors, state this in the Comments section on the Detailed Information page of the submission form.

-We invite you to include a Translational Perspective paragraph in your manuscript. This should be included in the main body of the manuscript after the Acknowledgements. It should describe the wider translational implications of the work, in plain English, for a broad scientific audience. Please use the following guidelines to prepare a Translational perspective of your paper [https://jp.msubmit.net/cgi-bin/main.plex?form\\_type=display\\_requirements#authortranspersp](https://jp.msubmit.net/cgi-bin/main.plex?form_type=display_requirements#authortranspersp) The Translational perspective should not exceed 250 words in total and should be presented as a single paragraph. Abbreviations and technical terms must be defined as briefly and simply as possible the first time they are used, unless they are generally/easily understood, e.g. ECG, HIV/AIDS, K<sup>+</sup> channel. Use language that can be understood by scientists or clinicians with a general knowledge of the topic addressed. Ensure the paragraph includes the hypothesis tested in the paper and accurately reflects the findings of the paper and the implications for future research. State the word count of the Translational perspective paragraph.

-Papers must comply with the Statistics Policy [https://jp.msubmit.net/cgi-bin/main.plex?form\\_type=display\\_requirements#statistics](https://jp.msubmit.net/cgi-bin/main.plex?form_type=display_requirements#statistics)

In summary:

-If  $n \leq 30$ , all data points must be plotted in the figure in a way that reveals their range and distribution. A bar graph with data points overlaid, a box and whisker plot or a violin plot (preferably with data points included) are acceptable formats.

-If  $n > 30$ , then the entire raw dataset must be made available either as supporting information, or hosted on a not-for-profit repository e.g. FigShare, with access details provided in the manuscript.

- $n$  clearly defined (e.g.  $x$  cells from  $y$  slices in  $z$  animals) in the Methods. Authors should be mindful of pseudoreplication.

-All relevant  $n$  values must be clearly stated in the main text, figures and tables, and the Statistical Summary Document (required upon revision)

-The most appropriate summary statistic (e.g. mean or median and standard deviation) must be used. Standard Error of the Mean (SEM) alone is not permitted.

-Exact  $p$  values must be stated. Authors must not use 'greater than' or 'less than'. Exact  $p$  values must be stated to three significant figures even when 'no statistical significance' is claimed.

-Statistics Summary Document completed appropriately upon revision

-Please include an Abstract Figure. The Abstract Figure is a piece of artwork designed to give readers an immediate understanding of the research and should summarise the main conclusions. If possible, the image should be easily 'readable' from left to right or top to bottom. It should show the physiological relevance of the manuscript so readers can

assess the importance and content of its findings. Abstract Figures should not merely recapitulate other figures in the manuscript. Please try to keep the diagram as simple as possible and without superfluous information that may distract from the main conclusion(s). Abstract Figures must be provided by authors no later than the revised manuscript stage and should be uploaded as a separate file during online submission labelled as File Type 'Abstract Figure'. Please ensure that you include the figure legend in the main article file. All Abstract Figures should be created using BioRender. Authors should use The Journal's premium BioRender account to export high-resolution images. Details on how to use and access the premium account are included as part of this email.

-----  
EDITOR COMMENTS

Reviewing Editor:

This revised study addressed the issues raised in the previous review and includes significant new data that increase the impact of the work. The new data show co-localization of insulin receptor and TRPV1 in a subset of DRG neurons and, more importantly, show increased renal sympathetic nerve activity and mean arterial pressure responses to injection of capsaicin into the arterial supply of the hindlimb in decerebrate rats after intramuscularly injecting insulin. Changes to the text, including the discussion, do a nice job of addressing issues raised by reviewers.

Senior Editor:

We thank the authors for careful revision of their manuscript, which has been markedly improved and deemed highly relevant and influential. The manuscript is now acceptable for publication. However, there are a minor point to address concerning format. Please state in the table/figure legend, the statistical used in the table/figure. I believe this refers to Table 1, Figure 2,5 and 8. Thank you for submitting this outstanding work to our Journal.

-----  
REFEREE COMMENTS

Referee #1:

No further comments! Congratulations on this outstanding contribution! Very impressive!

-----  
END OF COMMENTS

**1st Confidential Review**

**15-Dec-2021**

---



**Manuscript#: JP-RP-2021-281874X R1**

Insulin potentiates the response to capsaicin in dorsal root ganglion neurons *in vitro* and muscle afferents *ex vivo* in normal healthy rodents

**Reviewing Editor:**

This revised study addressed the issues raised in the previous review and includes significant new data that increase the impact of the work. The new data show co-localization of insulin receptor and TRPV1 in a subset of DRG neurons and, more importantly, show increased renal sympathetic nerve activity and mean arterial pressure responses to injection of capsaicin into the arterial supply of the hindlimb in decerebrate rats after intramuscularly injecting insulin. Changes to the text, including the discussion, do a nice job of addressing issues raised by reviewers.

**Senior Editor:**

We thank the authors for careful revision of their manuscript, which has been markedly improved and deemed highly relevant and influential. The manuscript is now acceptable for publication. However, there are a minor point to address concerning format. Please state in the table/figure legend, the statistical used in the table/figure. I believe this refers to Table 1, Figure 2, 5 and 8. Thank you for submitting this outstanding work to our Journal.

**Referee #1:**

No further comments! Congratulations on this outstanding contribution! Very impressive!

**Author response:** Again, we appreciate the reviewing editor, senior editor, and reviewers for their thoughtful comments and suggestions. We have addressed all formatting concerns (i.e., captions for Table 1, Figure 2, 5 and 8), and provided a figure for the abstract (uploaded) as well as a Translational Perspective (Lines 579-596). All changes made to the manuscript are indicated in red font in the red-lined version of the manuscript. Thank you!



Dear Dr Mizuno,

Re: JP-RP-2021-282740XR1 "Insulin potentiates the response to capsaicin in dorsal root ganglion neurons in vitro and muscle afferents ex vivo in normal healthy rodents" by Amane Hori, Norio Hotta, Ayumi Fukazawa, Juan A Estrada, Kimiaki Katanosaka, Kazue Mizumura, Jun Sato, Rie Ishizawa, Han Kyul Kim, Gary A Iwamoto, Wanpen Vongpatanasin, Jere H Mitchell, Scott A. Smith, and Masaki Mizuno

Thank you and congratulations on a fine study.

I am pleased to tell you that your paper has been accepted for publication in The Journal of Physiology.

**NEW POLICY:** In order to improve the transparency of its peer review process The Journal of Physiology publishes online as supporting information the peer review history of all articles accepted for publication. Readers will have access to decision letters, including all Editors' comments and referee reports, for each version of the manuscript and any author responses to peer review comments. Referees can decide whether or not they wish to be named on the peer review history document.

Are you on Twitter? Once your paper is online, why not share your achievement with your followers. Please tag The Journal (@jphysiol) in any tweets and we will share your accepted paper with our 23,000+ followers!

The last Word version of the paper submitted will be used by the Production Editors to prepare your proof. When this is ready you will receive an email containing a link to Wiley's Online Proofing System. The proof should be checked and corrected as quickly as possible.

Authors should note that it is too late at this point to offer corrections prior to proofing. The accepted version will be published online, ahead of the copy edited and typeset version being made available. Major corrections at proof stage, such as changes to figures, will be referred to the Reviewing Editor for approval before they can be incorporated. Only minor changes, such as to style and consistency, should be made a proof stage. Changes that need to be made after proof stage will usually require a formal correction notice.

All queries at proof stage should be sent to [TJP@wiley.com](mailto:TJP@wiley.com)

Yours sincerely,

Harold D Schultz  
Senior Editor  
The Journal of Physiology  
<https://jp.msubmit.net>  
<http://jp.physoc.org>  
The Physiological Society  
Hodgkin Huxley House  
30 Farringdon Lane  
London, EC1R 3AW  
UK  
<http://www.physoc.org>  
<http://journals.physoc.org>

P.S. - You can help your research get the attention it deserves! Check out Wiley's free Promotion Guide for best-practice recommendations for promoting your work at [www.wileyauthors.com/eeo/guide](http://www.wileyauthors.com/eeo/guide). And learn more about Wiley Editing Services which offers professional video, design, and writing services to create shareable video abstracts, infographics, conference posters, lay summaries, and research news stories for your research at [www.wileyauthors.com/eeo/promotion](http://www.wileyauthors.com/eeo/promotion).

\* IMPORTANT NOTICE ABOUT OPEN ACCESS \*

Information about Open Access policies can be found here <https://physoc.onlinelibrary.wiley.com/hub/access-policies>

To assist authors whose funding agencies mandate public access to published research findings sooner than 12 months after publication The Journal of Physiology allows authors to pay an open access (OA) fee to have their papers made freely available immediately on publication.

You will receive an email from Wiley with details on how to register or log-in to Wiley Authors Services where you will be able to place an OnlineOpen order.

You can check if your funder or institution has a Wiley Open Access Account here <https://authorservices.wiley.com/author-resources/Journal-Authors/licensing-and-open-access/open-access/author-compliance-tool.html>

Your article will be made Open Access upon publication, or as soon as payment is received.

If you wish to put your paper on an OA website such as PMC or UKPMC or your institutional repository within 12 months of publication you must pay the open access fee, which covers the cost of publication.

OnlineOpen articles are deposited in PubMed Central (PMC) and PMC mirror sites. Authors of OnlineOpen articles are permitted to post the final, published PDF of their article on a website, institutional repository, or other free public server, immediately on publication.

Note to NIH-funded authors: The Journal of Physiology is published on PMC 12 months after publication, NIH-funded authors DO NOT NEED to pay to publish and DO NOT NEED to post their accepted papers on PMC.

**2nd Confidential Review**

**22-Dec-2021**

---
